# Supplementary material for: Solution processable polyamines via click chemistry for water purification
Source: Royal Society of Chemistry journal article supplement (doi:10.1039/c5ra04155d), 2015-01-01
Supplement: c5ra04155d1.pdf [file c5ra04155d1.pdf]

# Solution processable polyamines via click chemistry for water purification

Vanga Devendar Goud, Roshan DSouza, Suresh Valiyaveetil\*  
Department of Chemistry, National University of Singapore,  
3 Science Drive 3, Singapore 117 543  
Correspondence to: S. Valiyaveetil (E - mail: [chmsv@nus.edu.sg](mailto:chmsv@nus.edu.sg))

## SUPPLEMENTARY INFORMATION

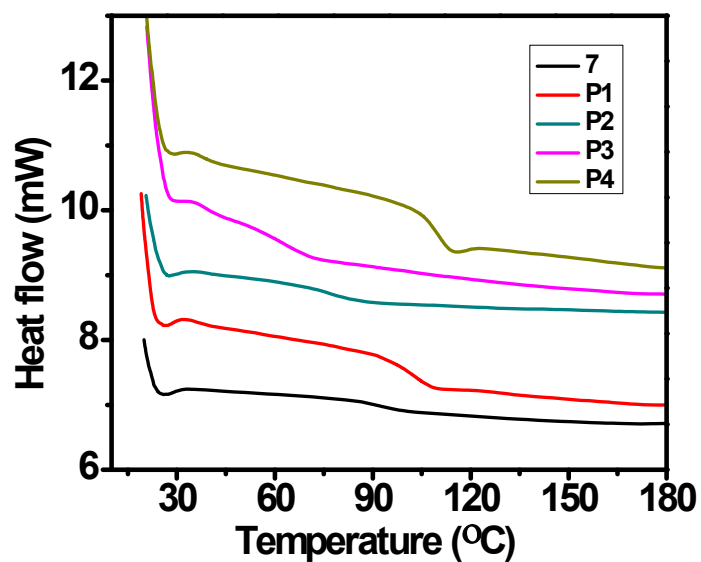

Figure S1. DSC curves of random copolymers in nitrogen atmosphere

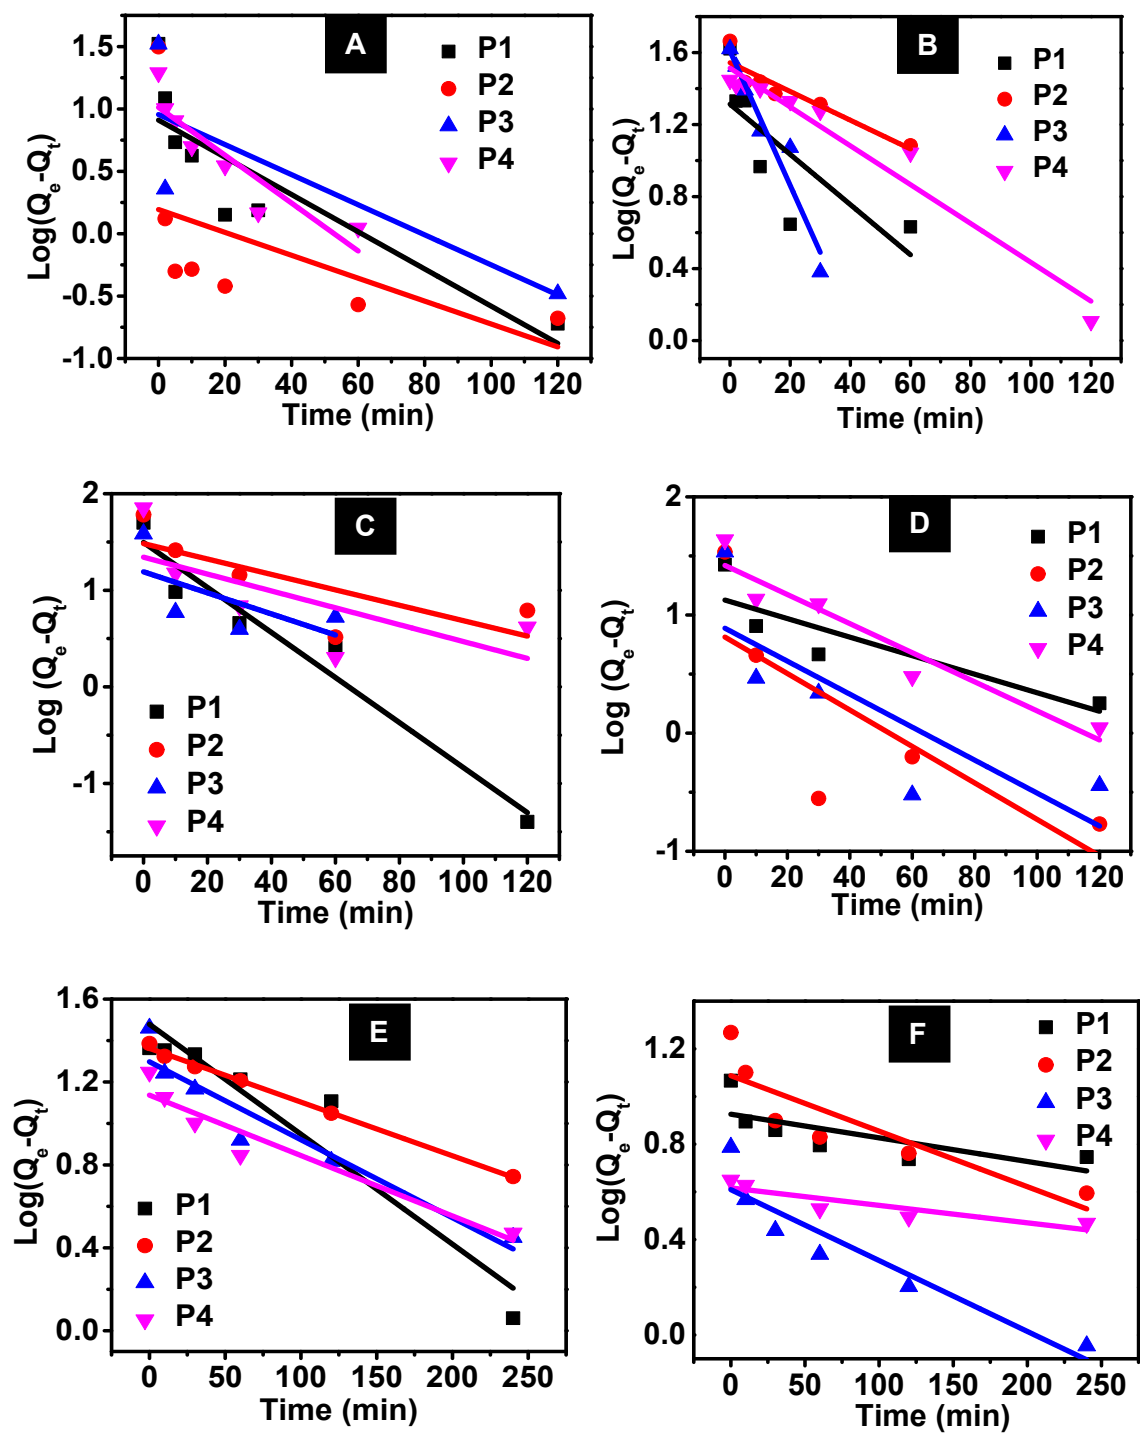

**Figure S2.** Pseudo-first order kinetics for the polymers with (A) Ag-PVP, (B) Au-PVP, (C) Brilliant Blue, (D) Neutral Red, (E) Pb(II) and (F) Cr(VI) ions.
